# Supplementary material
Source: PubMed Central journal article supplement (PMC6179443)

A

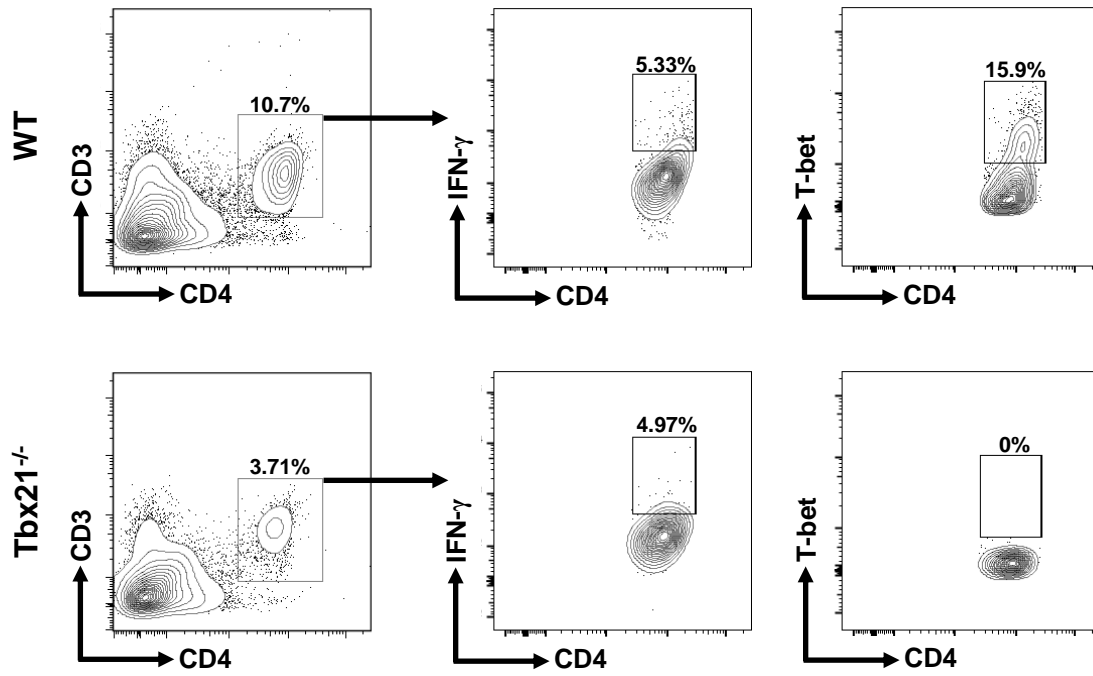

B

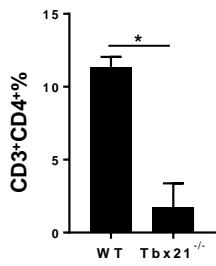

C

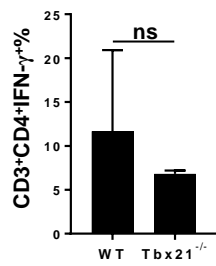

D

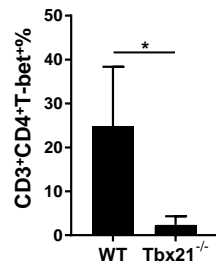

E

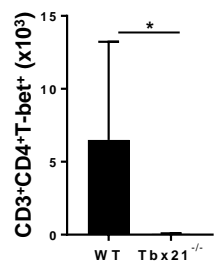

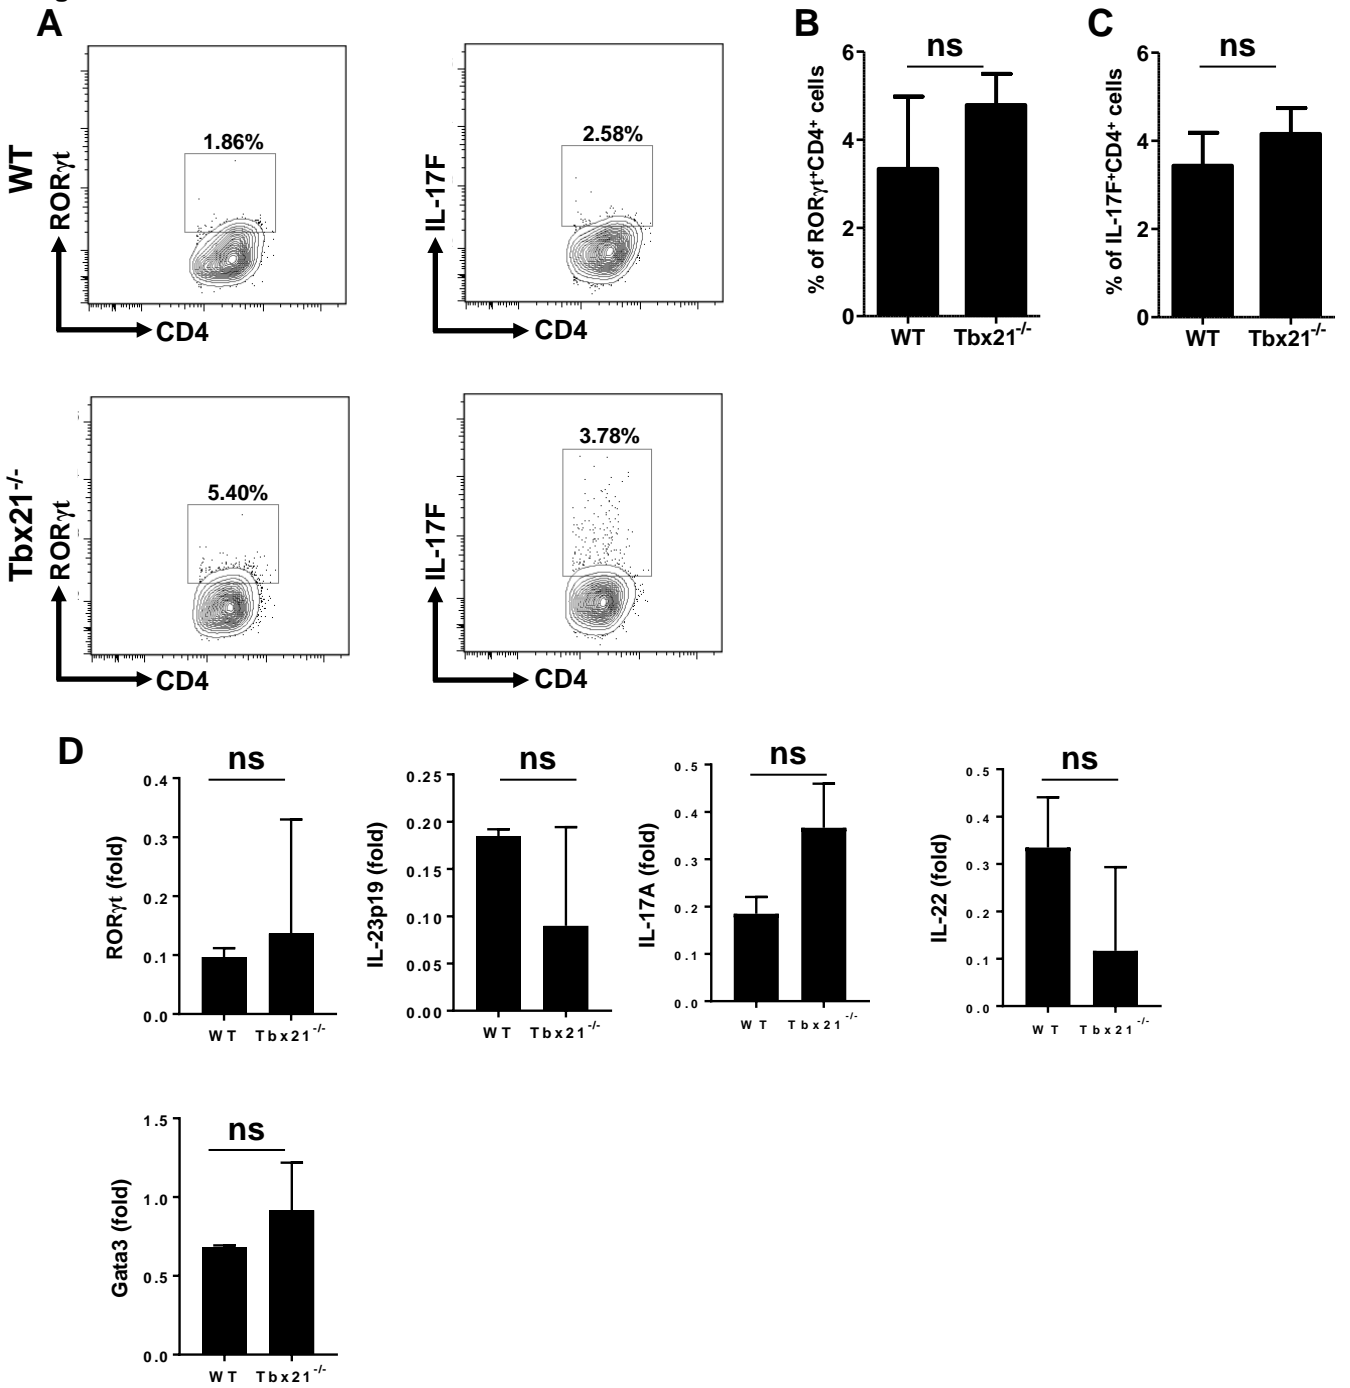

**A**

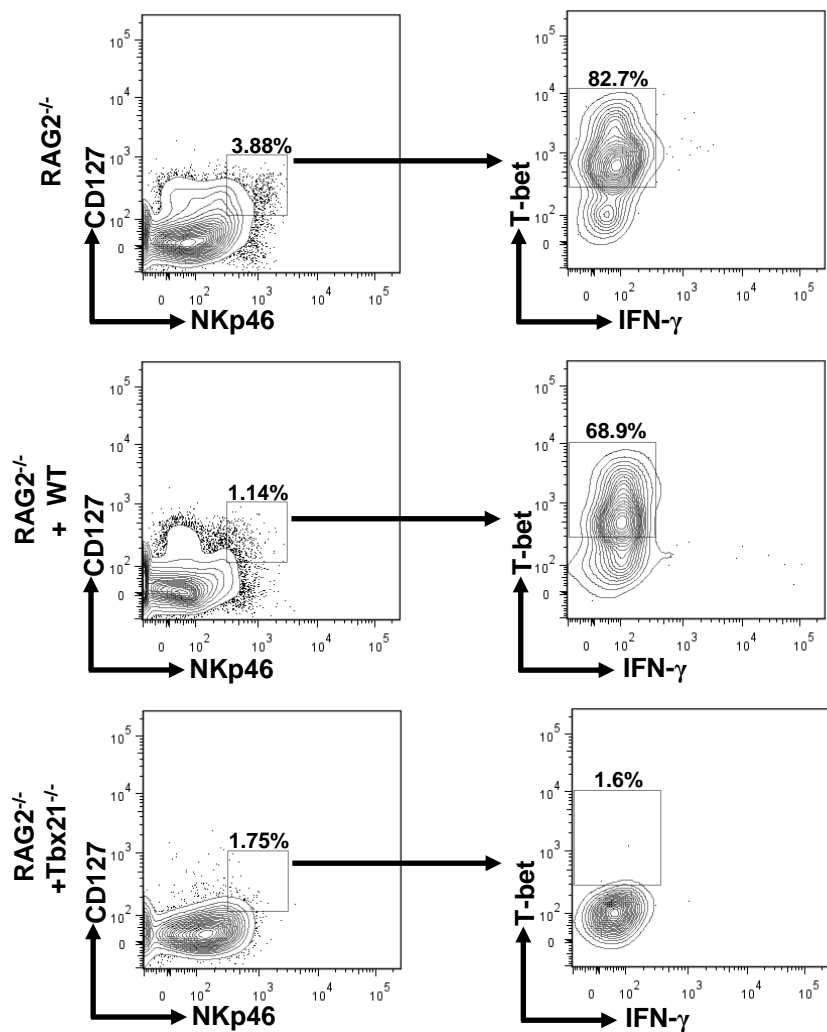

**B**

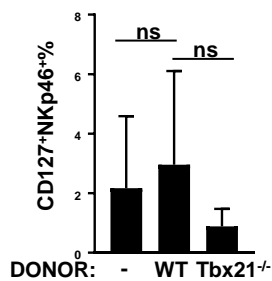

**C**

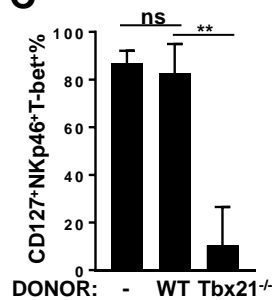

**D**

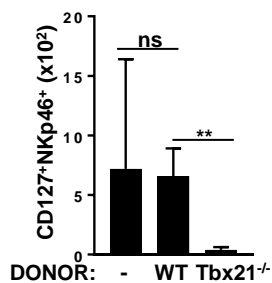

**E**

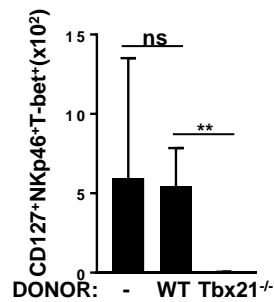

Supplement: NIHMS916415-supplement-supplement_1.pdf [file NIHMS916415-supplement-supplement_1.pdf]
